# Supplementary material for: The Lockdown Impact on the Relations between Portuguese Parents and Their 1- to 3-Year-Old Children during the COVID-19 Pandemic
Source: Children (Basel). 2022 Jul 28;9(8):1124. doi: 10.3390/children9081124 (PMC9406864; doi:10.3390/children9081124)
Supplement: Supplementary file 1 [file children-09-01124-s001.zip › children-1785626-supplementary.pdf]

**Table S1.** Univariable analysis for the outcome: Impact perceived by parents.

| Variables                                                          | OR-estimate (95%CI)   | p-value |
|--------------------------------------------------------------------|-----------------------|---------|
| Father <sup>a</sup>                                                | 1.25 (0.54 to 2.90)   | 0.609   |
| Age of adult (years)                                               | 0.97 (0.93 to 1.02)   | 0.244   |
| Marital status <sup>b</sup>                                        |                       |         |
| Married / couple                                                   | 1.35 (0.57 to 3.18)   | 0.491   |
| Divorced / separated                                               | 0.72 (0.17 to 3.02)   | 0.649   |
| Education: university <sup>c</sup>                                 | 0.53 (0.24 to 1.17)   | 0.114   |
| Occupation <sup>d</sup>                                            |                       |         |
| Self-employed                                                      | 1.50 (0.74 to 3.04)   | 0.261   |
| Unemployed                                                         | 1.32 (0.41 to 4.28)   | 0.645   |
| Other                                                              | 0.69 (0.24 to 1.94)   | 0.477   |
| Child age <sup>e</sup>                                             |                       |         |
| 2 year old child                                                   | 0.60 (0.33 to 1.12)   | 0.109   |
| 3 year old child                                                   | 0.44 (0.24 to 0.81)   | 0.008   |
| Who took care of the child before the lockdown <sup>f</sup>        |                       |         |
| Mother / father / both                                             | 2.49 (0.78 to 7.98)   | 0.126   |
| Grandparents / other relatives                                     | 1.15 (0.52 to 2.55)   | 0.722   |
| Time of contact with the child (hours) before the lockdown         | 1.10 (0.92 to 1.32)   | 0.309   |
| Psychiatric history <sup>g</sup>                                   |                       |         |
| Current psychiatric or psychologic follow-up                       | 0.67 (0.42 to 1.07)   | 0.096   |
| Past psychiatric or psychologic follow-up                          | 0.61 (0.27 to 1.37)   | 0.234   |
| Psychiatric medication                                             | 1.24 (0.63 to 2.42)   | 0.534   |
| Number of children residing with the child in confinement          | 0.93 (0.75 to 1.15)   | 0.475   |
| Number of adults residing with the child in confinement            | 1.36 (0.88 to 2.09)   | 0.162   |
| Working place during the lockdown <sup>h</sup>                     |                       |         |
| Working from home                                                  | 0.99 (0.50 to 1.98)   | 0.995   |
| Lay off/already worked from home                                   | 0.88 (0.44 to 1.75)   | 0.712   |
| Shared the care of child during confinement                        | 1.52 (0.97 to 2.39)   | 0.067   |
| Not stayed in the same address                                     | 0.86 (0.46 to 1.60)   | 0.631   |
| Not maintained same household composition                          | 0.74 (0.39 to 1.42)   | 0.365   |
| Shared experiences with the child                                  | 2.84 (1.58 to 5.10)   | <0.001  |
| Evolution in the development of the child                          | 10.49 (5.48 to 20.09) | <0.001  |
| Regression in the child                                            | 0.26 (0.16 to 0.40)   | <0.001  |
| Interference of the child behavior in the daily tasks <sup>i</sup> |                       |         |
| Easier to handle tasks                                             | 0.62 (0.24 to 1.62)   | 0.621   |
| Harder to handle tasks                                             | 0.18 (0.09 to 0.34)   | 0.176   |
| PDHS: subscale challenging behavior                                | 0.85 (0.81 to 0.89)   | <0.001  |
| PDHS: subscale parents' tasks                                      | 0.89 (0.86 to 0.92)   | <0.001  |
| PDHS: High Stress of Parents (FS) <sup>j</sup>                     | 0.27 (0.18 to 0.42)   | <0.001  |
| PDHS: High Pressure on Parents (IS) <sup>k</sup>                   | 0.30 (0.18 to 0.48)   | <0.001  |

Note: PDHS: Parenting daily hassles scale; FS: frequency scale; IS: intensity scale. Reference categories: <sup>a</sup>mother; <sup>b</sup>single; <sup>c</sup>lower than university; <sup>d</sup>employee; <sup>e</sup>1 year old child; <sup>f</sup>kindergarten/babysitter; <sup>g</sup>no psychiatric history; <sup>h</sup>in the workplace; <sup>i</sup>there were no changes; <sup>j</sup>low stress of parents; <sup>k</sup>low pressure on parents.

**Table S2.** Univariable analysis for the outcome: Regressions in children development perceived by parents.

| Variables                   | OR-estimate (95%CI) | p-value |
|-----------------------------|---------------------|---------|
| Father <sup>a</sup>         | 0.93 (0.51 to 1.35) | 0.451   |
| Age of adult (years)        | 1.01 (0.98 to 1.03) | 0.716   |
| Marital status <sup>b</sup> |                     |         |
| Married / couple            | 0.73 (0.43 to 1.22) | 0.228   |

|                                                             |                     |        |
|-------------------------------------------------------------|---------------------|--------|
| Divorced / separated                                        | 0.84 (0.31 to 2.29) | 0.726  |
| Education: university <sup>c</sup>                          | 0.94 (0.66 to 1.36) | 0.757  |
| Occupation <sup>d</sup>                                     |                     |        |
| Self-employed                                               | 0.68 (0.46 to 1.02) | 0.064  |
| Unemployed                                                  | 0.88 (0.46 to 1.68) | 0.687  |
| Other                                                       | 1.45 (0.76 to 2.79) | 0.261  |
| Child age <sup>e</sup>                                      |                     |        |
| 2 year old child                                            | 2.30 (1.57 to 3.37) | <0.001 |
| 3 year old child                                            | 3.19 (2.18 to 4.67) | <0.001 |
| Who took care of the child before the lockdown <sup>f</sup> |                     |        |
| Mother / father / both                                      | 0.61 (0.35 to 1.05) | 0.074  |
| Grandparents / other relatives                              | 0.54 (0.31 to 0.94) | 0.028  |
| Time of contact with the child (hours) before the lockdown  | 0.97 (0.88 to 1.08) | 0.618  |
| Psychiatric history <sup>g</sup>                            |                     |        |
| Current psychiatric or psychologic follow-up                | 1.19 (0.69 to 2.04) | 0.539  |
| Past psychiatric or psychologic follow-up                   | 1.40 (1.06 to 1.85) | 0.018  |
| Psychiatric medication                                      | 1.26 (0.89 to 1.79) | 0.191  |
| Number of children residing with the child in confinement   | 0.95 (0.82 to 1.09) | 0.457  |
| Number of adults residing with the child in confinement     | 0.92 (0.75 to 1.13) | 0.426  |
| Working place during the lockdown <sup>h</sup>              |                     |        |
| Working from home                                           | 1.62 (1.03 to 2.55) | 0.036  |
| Lay off/already worked from home                            | 1.68 (1.06 to 2.66) | 0.026  |
| Shared the care of child during confinement                 | 0.85 (0.64 to 1.12) | 0.239  |
| Not stayed in the same address                              | 1.18 (0.81 to 1.72) | 0.387  |
| Not maintained same household composition                   | 1.09 (0.72 to 1.65) | 0.692  |
| Positive impact in the relationship                         | 0.26 (0.16 to 0.40) | <0.001 |
| Shared new experiences with the child                       | 0.52 (0.34 to 0.78) | 0.002  |
| Attitude and behavior of the child <sup>i</sup>             |                     |        |
| More challenging harder to handle child                     | 3.91 (2.80 to 5.45) | <0.001 |
| More collaborative easier to handle child                   | 1.15 (0.72 to 1.81) | 0.565  |
| PDHS: subscale challenging behavior                         | 1.11 (1.09 to 1.14) | <0.001 |
| PDHS: subscale parents' tasks                               | 1.07 (1.05 to 1.10) | <0.001 |
| PDHS: High Stress of Parents (FS) <sup>j</sup>              | 2.46 (1.90 to 3.20) | <0.001 |
| PDHS: High Pressure on Parents (IS) <sup>k</sup>            | 3.13 (2.28 to 4.29) | <0.001 |

Note: PDHS: Parenting daily hassles scale; FS: frequency scale; IS: intensity scale. Reference categories: <sup>a</sup>mother; <sup>b</sup>single; <sup>c</sup>lower than university; <sup>d</sup>employee; <sup>e</sup>1 year old child; <sup>f</sup>kindergarten/babysitter; <sup>g</sup>no psychiatric history; <sup>h</sup>in the workplace; <sup>i</sup>there were no changes; <sup>j</sup>low stress of parents; <sup>k</sup>low pressure on parents.

**Table S3.** Univariable analysis for the outcome: Willingness to promote some change in family routines in the future.

| Variables                                                   | OR-estimate (95%CI) | p-value |
|-------------------------------------------------------------|---------------------|---------|
| Father <sup>a</sup>                                         | 0.80 (0.58 to 1.12) | 0.191   |
| Age of adult (years)                                        | 0.98 (0.96 to 1.00) | 0.061   |
| Marital status <sup>b</sup>                                 |                     |         |
| Married / couple                                            | 0.66 (0.42 to 1.03) | 0.066   |
| Divorced / separated                                        | 0.63 (0.29 to 1.40) | 0.255   |
| Education: university <sup>c</sup>                          | 0.86 (0.65 to 1.13) | 0.277   |
| Occupation <sup>d</sup>                                     |                     |         |
| Self-employed                                               | 1.05 (0.80 to 1.40) | 0.744   |
| Unemployed                                                  | 1.14 (0.71 to 1.83) | 0.588   |
| Other                                                       | 0.65 (0.39 to 1.11) | 0.115   |
| Child age <sup>e</sup>                                      |                     |         |
| 2 year old child                                            | 1.01 (0.80 to 1.27) | 0.969   |
| 3 year old child                                            | 0.92 (0.73 to 1.18) | 0.520   |
| Who took care of the child before the lockdown <sup>f</sup> |                     |         |
| Mother / father / both                                      | 1.11 (0.78 to 1.58) | 0.571   |

|                                                            |                     |        |
|------------------------------------------------------------|---------------------|--------|
| Grandparents / other relatives                             | 1.15 (0.82 to 1.62) | 0.408  |
| Time of contact with the child (hours) before the lockdown | 0.95 (0.88 to 1.03) | 0.223  |
| Psychiatric history <sup>g</sup>                           |                     |        |
| Current psychiatric or psychologic follow-up               | 1.52 (0.99 to 2.33) | 0.054  |
| Past psychiatric or psychologic follow-up                  | 1.28 (1.03 to 1.59) | 0.026  |
| Psychiatric medication                                     | 1.25 (0.94 to 1.65) | 0.122  |
| Number of children residing with the child in confinement  | 0.97 (0.88 to 1.07) | 0.540  |
| Number of adults residing with the child in confinement    | 1.26 (1.07 to 1.47) | 0.004  |
| Working place during the lockdown <sup>h</sup>             |                     |        |
| Working from home                                          | 1.38 (1.04 to 1.83) | 0.027  |
| Lay off/already worked from home                           | 1.51 (1.13 to 2.02) | 0.006  |
| Shared the care of child during confinement                | 1.03 (0.84 to 1.27) | 0.774  |
| Not stayed in the same address                             | 1.07 (0.80 to 1.43) | 0.637  |
| Not maintained same household composition                  | 1.25 (0.90 to 1.72) | 0.186  |
| Shared new experiences with the child                      | 3.07 (2.15 to 4.38) | <0.001 |
| Attitude and behavior of the child <sup>i</sup>            |                     |        |
| More challenging harder to handle child                    | 1.58 (1.28 to 1.95) | <0.001 |
| More collaborative easier to handle child                  | 2.95 (2.23 to 3.91) | <0.001 |
| PDHS: subscale challenging behavior                        | 1.00 (0.99 to 1.02) | 0.624  |
| PDHS: subscale parents' tasks                              | 1.01 (0.99 to 1.02) | 0.261  |
| PDHS: High Stress of Parents (FS) <sup>j</sup>             | 1.35 (1.09 to 1.67) | 0.006  |
| PDHS: High Pressure on Parents (IS) <sup>k</sup>           | 1.08 (0.81 to 1.44) | 0.608  |
| Father <sup>a</sup>                                        | 0.80 (0.58 to 1.12) | 0.191  |

Note: PDHS: Parenting daily hassles scale; FS: frequency scale; IS: intensity scale. Reference categories: <sup>a</sup>mother; <sup>b</sup>single; <sup>c</sup>lower than university; <sup>d</sup>employee; <sup>e</sup>1 year old child; <sup>f</sup>kindergarten/babysitter; <sup>g</sup>no psychiatric history; <sup>h</sup>in the workplace; <sup>i</sup>there was no change in the child's behavior; <sup>j</sup>low stress of parents; <sup>k</sup>low pressure on parents.
